# Supplementary material for: Restoration of Cathepsin D Level via L-Serine Attenuates PPA-Induced Lysosomal Dysfunction in Neuronal Cells
Source: MDPI journal article supplement (doi:10.3390/ijms231810613), 2022-09-13
Supplement: s1 [file s1]

## Supplementary Information

# Restoration of Cathepsin D Level via L-Serine Attenuates PPA-Induced Lysosomal Dysfunction in Neuronal Cells

Hyunbum Jeon 1,2, Yeo Jin Kim 1, Su-Kyeong Hwang 3,4, Jinsoo Seo 2 and Ji Young Mun 1,\*

1 Neural Circuit Research Group, Korea Brain Research Institute, Daegu 41062, Korea

2 Department of Brain Sciences, Daegu Gyeongbuk Institute of Science and Technology (DGIST), Daegu 42988, Korea

3 Department of Pediatrics, School of Medicine, Kyungpook National University, Daegu 41944, Korea

4 Astrogen Inc., 440, Hyeoksin-daero, Dong-gu, Daegu 41072, Korea

\* Correspondence: Correspondence: [jymun@kbri.re.kr](mailto:jymun@kbri.re.kr)

## Supplementary Figures

(A)

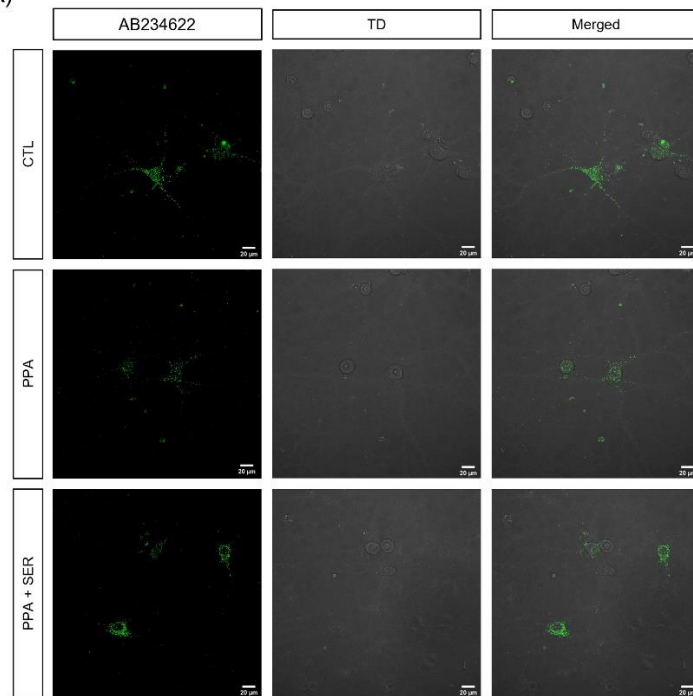

(B)

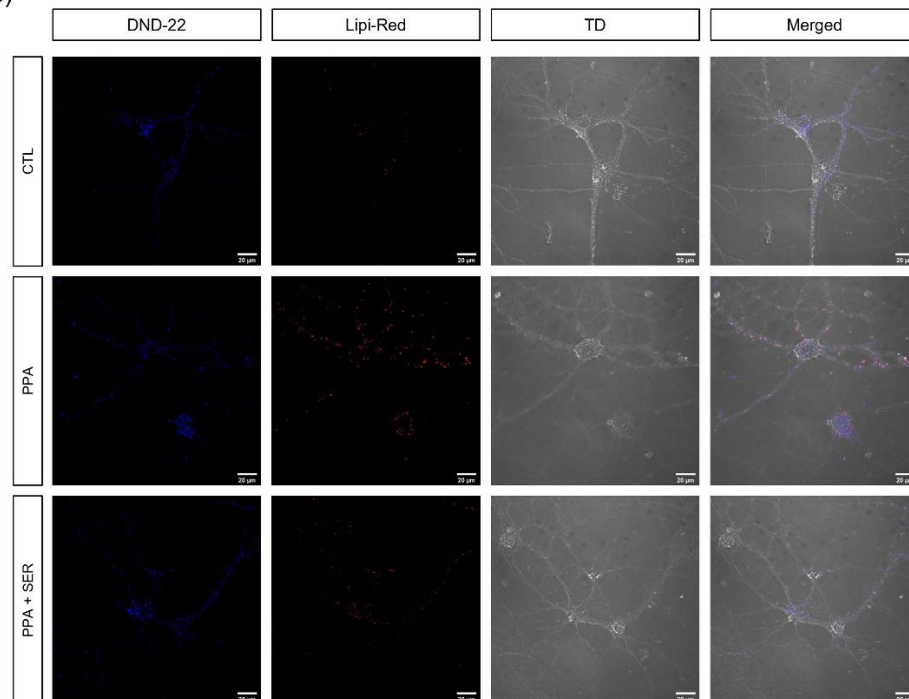

**Supplementary Figure S1.** L-serine (SER) reduced the colocalization of lysosomes and lipid droplets against PPA. (A) Representative fluorescence images of the release of the self-quenched substrate in hippocampal neurons. Confocal images showed lysosomal activity with green fluorescence. Scale bar, 20  $\mu$ m. TD : transmitted light detector image. AB234622 : Lysosomal intracellular activity assay kit. (B) Representative fluorescence images of colocalization of lysosome and lipid droplets (LD) in hippocampal neurons. Blue fluorescent signals represent

lysosomes and red fluorescent signals represent lipid droplets (LD). Scale bar, 20  $\mu$ m.

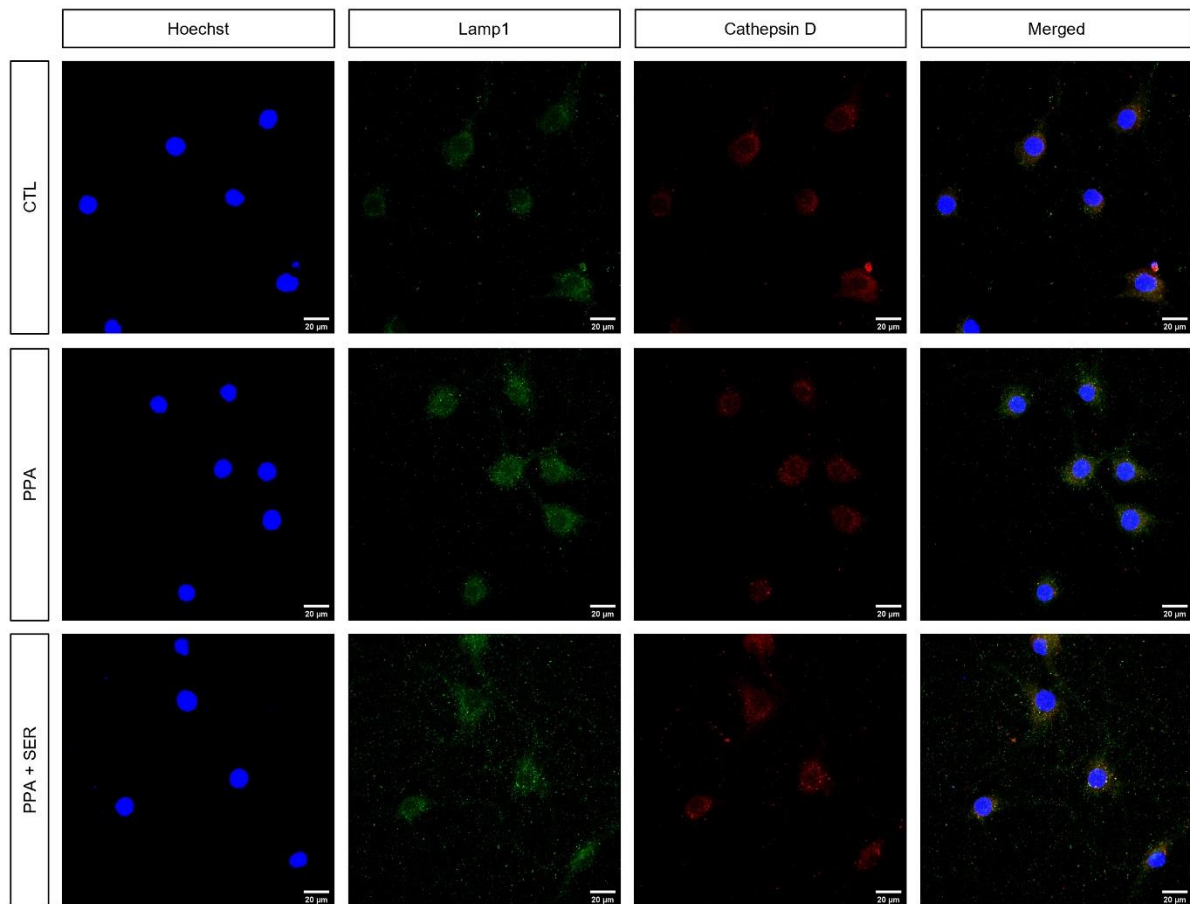

**Supplementary Figure S2.** L-serine (SER) increased lysosomal activity in hippocampal neurons. Representative lamp1 and CTSD immunocytochemistry images of rat hippocampal neurons. Cultured neurons were treated at DIV 18 with 100  $\mu$ M PPA or 100  $\mu$ M PPA and 100  $\mu$ M L-serine for 48 h, and immunolabelled for lamp1 or CTSD. Scale bar, 20  $\mu$ m.

## Supplementary Table S1

Figure 2. (B)

| Group             | Summary | <i>p</i> value   |
|-------------------|---------|------------------|
| CTL vs. PPA       | ****    | <0.0001 0.000079 |
| CTL vs. PPA + SER | ns      | ns 0.94269       |
| PPA vs. PPA + SER | ***     | <0.001 0.000223  |

(D)

| Group             | Summary | <i>p</i> value |
|-------------------|---------|----------------|
| CTL vs. PPA       | *       | <0.05 0.0163   |
| CTL vs. PPA + SER | ns      | ns 0.6164      |
| PPA vs. PPA + SER | ns      | ns 0.0883      |

Figure 3. (B)

| Group             | Summary | <i>p</i> value      |
|-------------------|---------|---------------------|
| CTL vs. PPA       | ****    | <0.0001 5E-10       |
| CTL vs. PPA + SER | ****    | <0.0001 5E-10       |
| PPA vs. PPA + SER | ****    | <0.0001 7.01145E-05 |

(C)

| Group             | Summary | <i>p</i> value     |
|-------------------|---------|--------------------|
| CTL vs. PPA       | ****    | <0.0001 5E-10      |
| CTL vs. PPA + SER | ****    | <0.0001 1.863E-07  |
| PPA vs. PPA + SER | ***     | <0.001 0.000511297 |

(D)

| Group             | Summary | <i>p</i> value   |
|-------------------|---------|------------------|
| CTL vs. PPA       | ****    | <0.0001 6E-10    |
| CTL vs. PPA + SER | ****    | <0.0001 6.88E-08 |
| PPA vs. PPA + SER | ns      | ns 0.378272859   |

Figure 4. (D) LD volume

| Group             | Summary | <i>p</i> value     |
|-------------------|---------|--------------------|
| PPA vs. PPA + SER | ****    | <0.0001 9.5753E-06 |

(D) LD area

| Group             | Summary | <i>p</i> value     |
|-------------------|---------|--------------------|
| PPA vs. PPA + SER | ***     | <0.001 0.000144046 |

Figure 5. (B)

| Group             | Summary | <i>p</i> value |
|-------------------|---------|----------------|
| CTL vs. PPA       | *       | <0.05 0.0155   |
| CTL vs. PPA + SER | ns      | ns 0.9758      |
| PPA vs. PPA + SER | *       | <0.05 0.025    |

Figure 5. (D) Total colocalization area

| Group             | Summary | <i>p</i> value |        |
|-------------------|---------|----------------|--------|
| CTL vs. PPA       | ***     | <0.001         | 0.0002 |
| CTL vs. PPA + SER | ns      | ns             | 0.3127 |
| PPA vs. PPA + SER | **      | <0.01          | 0.0027 |

**(D) Average colocalization size**

| Group             | Summary | <i>p</i> value |        |
|-------------------|---------|----------------|--------|
| CTL vs. PPA       | **      | <0.01          | 0.0026 |
| CTL vs. PPA + SER | ns      | ns             | 0.9927 |
| PPA vs. PPA + SER | **      | <0.01          | 0.0031 |

**Figure 6. (B) Lamp1 integrated density**

| Group             | Summary | <i>p</i> value |             |
|-------------------|---------|----------------|-------------|
| CTL vs. PPA       | ns      | ns             | 0.162150718 |
| CTL vs. PPA + SER | ****    | <0.0001        | 2.0057E-06  |
| PPA vs. PPA + SER | **      | <0.01          | 0.002658303 |

**(B) CTSD integrated density**

| Group             | Summary | <i>p</i> value |        |
|-------------------|---------|----------------|--------|
| CTL vs. PPA       | ns      | ns             | 0.198  |
| CTL vs. PPA + SER | ns      | ns             | 0.3681 |
| PPA vs. PPA + SER | *       | <0.05          | 0.0115 |

**(D) Prepro CTSD**

| Group                         | Summary | <i>p</i> value |             |
|-------------------------------|---------|----------------|-------------|
| CTL vs. PPA                   | *       | <0.05          | 0.01684855  |
| CTL vs. PPA+SER_100uM         | ns      | ns             | 0.220110645 |
| CTL vs. PPA+SER_1mM           | ns      | ns             | 0.742786083 |
| PPA vs. PPA+SER_100uM         | ns      | ns             | 0.318346241 |
| PPA vs. PPA+SER_1mM           | **      | <0.01          | 0.004557476 |
| PPA+SER_100uM vs. PPA+SER_1mM | ns      | ns             | 0.053120381 |

**(D) Mature CTSD**

| Group                         | Summary | <i>p</i> value |             |
|-------------------------------|---------|----------------|-------------|
| CTL vs. PPA                   | *       | <0.05          | 0.01176152  |
| CTL vs. PPA+SER_100uM         | ns      | ns             | 0.068776054 |
| CTL vs. PPA+SER_1mM           | ns      | ns             | 0.987873595 |
| PPA vs. PPA+SER_100uM         | ns      | ns             | 0.595546612 |
| PPA vs. PPA+SER_1mM           | *       | <0.05          | 0.017984725 |
| PPA+SER_100uM vs. PPA+SER_1mM | ns      | ns             | 0.10793986  |

**(D) Lamp1**

| Group                         | Summary | <i>p</i> value |             |
|-------------------------------|---------|----------------|-------------|
| CTL vs. PPA                   | ns      | ns             | 0.130169388 |
| CTL vs. PPA+SER_100uM         | ***     | <0.001         | 0.000383434 |
| CTL vs. PPA+SER_1mM           | ns      | ns             | 0.216728239 |
| PPA vs. PPA+SER_100uM         | ns      | ns             | 0.129359757 |
| PPA vs. PPA+SER_1mM           | ns      | ns             | 0.441288019 |
| PPA+SER_100uM vs. PPA+SER_1mM | ns      | ns             | 0.05003386  |
